# Supplementary material
Source: PubMed Central journal article supplement (PMC3832281)
Supplement: 2c2f30f04d431c961b9487293c8969b3_genetics.113.157719-1.pdf [file 2c2f30f04d431c961b9487293c8969b3_genetics.113.157719-1.pdf]

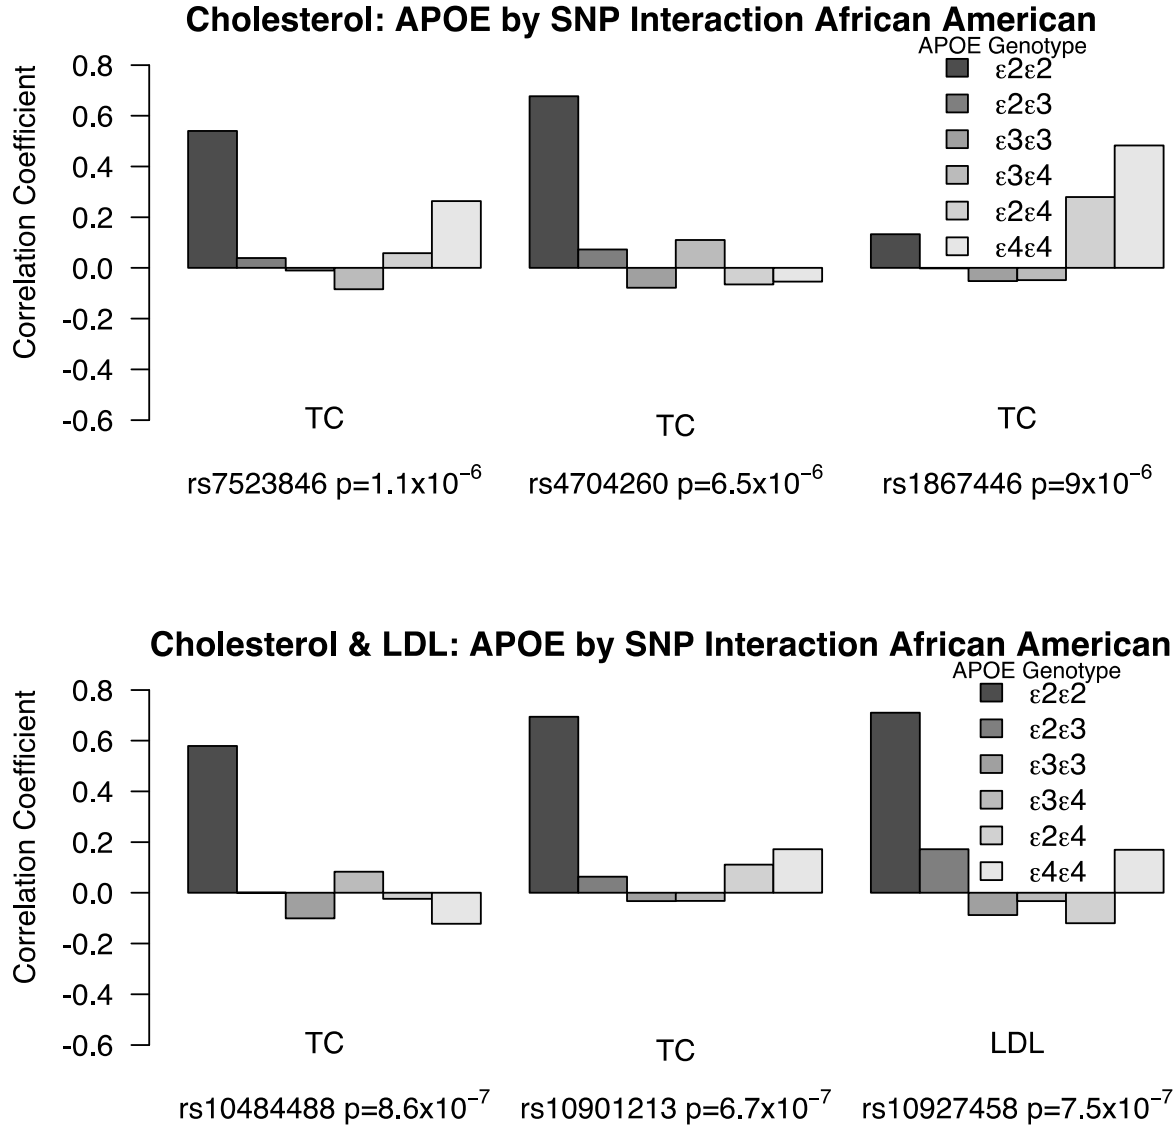

**Figure S1** A plot similar to **Figure 2** in the main text for each of the SNPs in **Table S1** that interact with APOE to affect TC and LDL in African Americans. These tests were significant with the parametric test yet dropped below significance after calculating empirical p-values with 100 million parametric bootstrap replicate for each SNP. Plots are based on *within* APOE genotype models after adjusting for covariates while the p-values are based on the APOE\*SNP interaction in the full model where the APOE genotypes are treated as factors and the SNP is treated as a (0,1,2) additive variable. The beta coefficients from the linear model provide the same story but the correlation coefficient is easier to visualize.

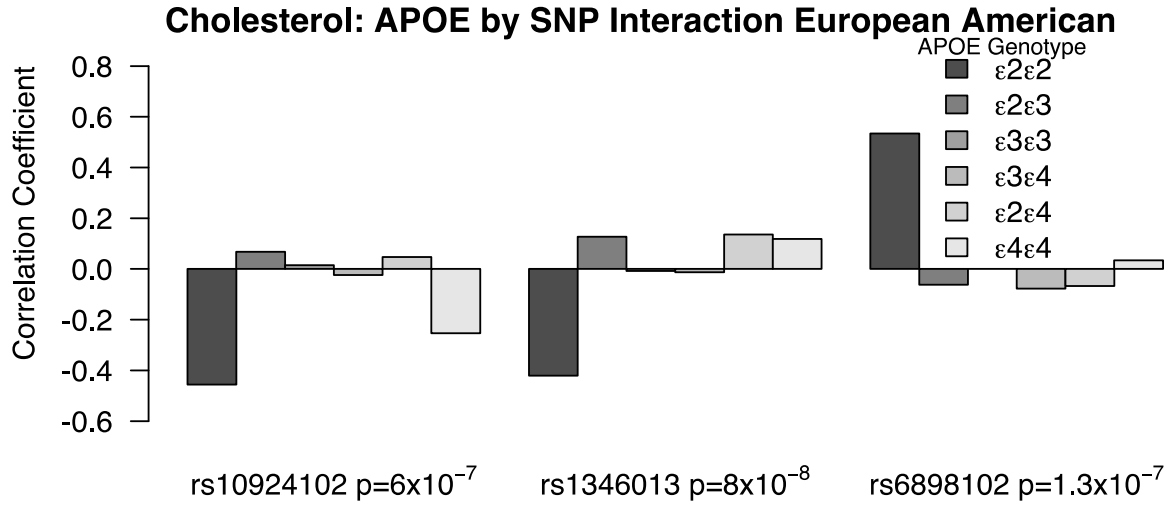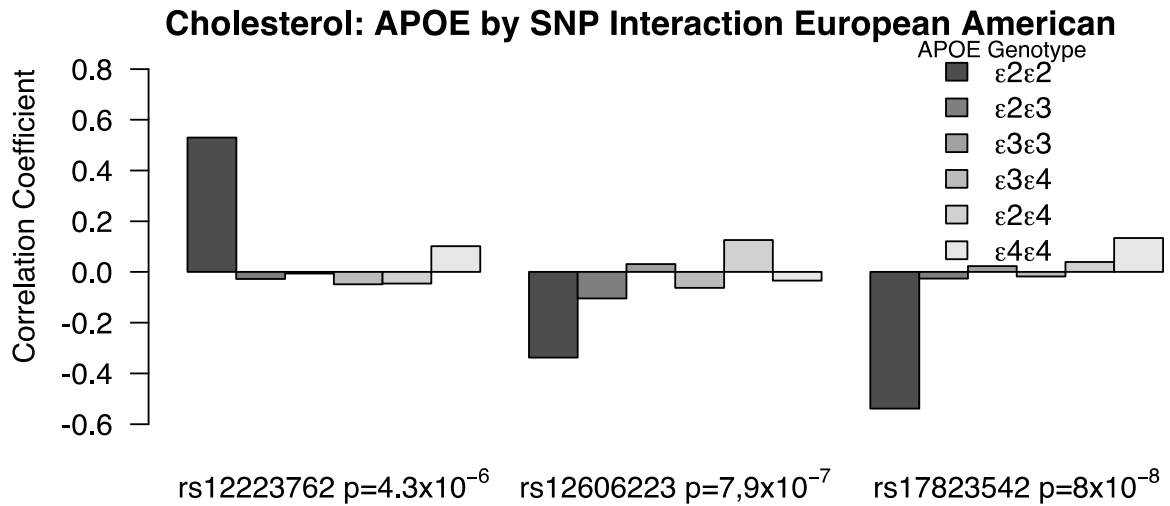

**Figure S2** A plot similar to **Figure 2** in the main text for each of the SNPs in **Table S1** that interact with APOE to affect TC in European Americans. These tests were significant with the parametric test yet dropped below significance after calculating empirical p-values with 100 million parametric bootstrap replicate for each SNP. Plots are based on *within* APOE genotype models after adjusting for covariates while the p-values are based on the APOE\*SNP interaction in the full model where the APOE genotypes are treated as factors and the SNP is treated as a (0,1,2) additive variable. The beta coefficients from the linear model provide the same story but the correlation coefficient is easier to visualize.

APOExSNP CHD AA

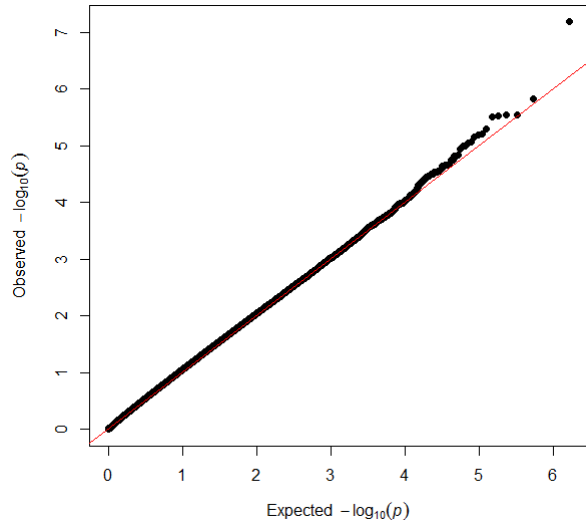

APOExSNP TC AA

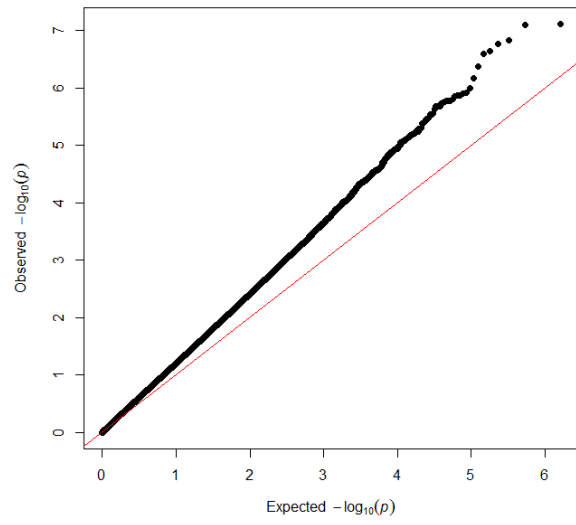

APOExSNP LDL AA

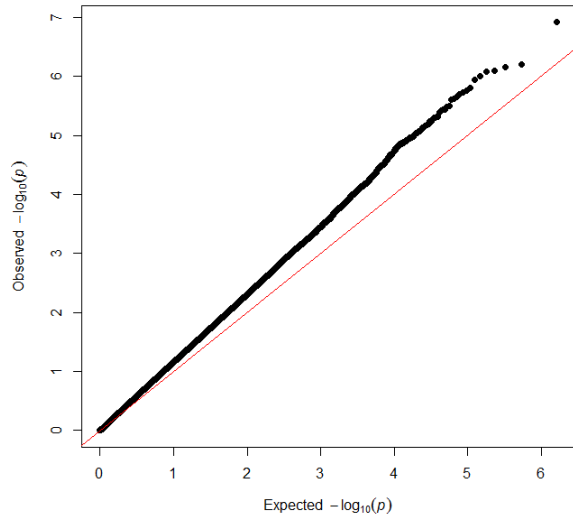

APOExSNP HDL AA

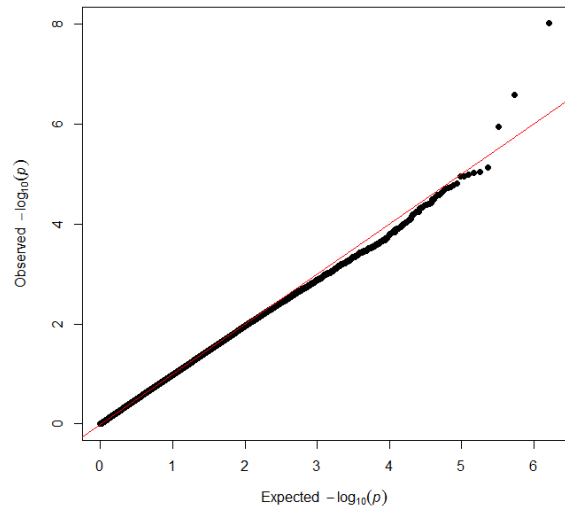

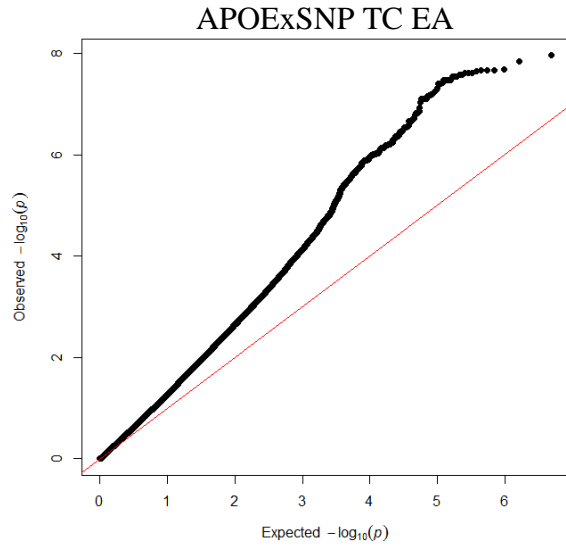

**Figure S3** QQ Plots for each of the APOE x SNP interaction scans from the parametric tests.

## AA APOExSNP Interactions for CHD

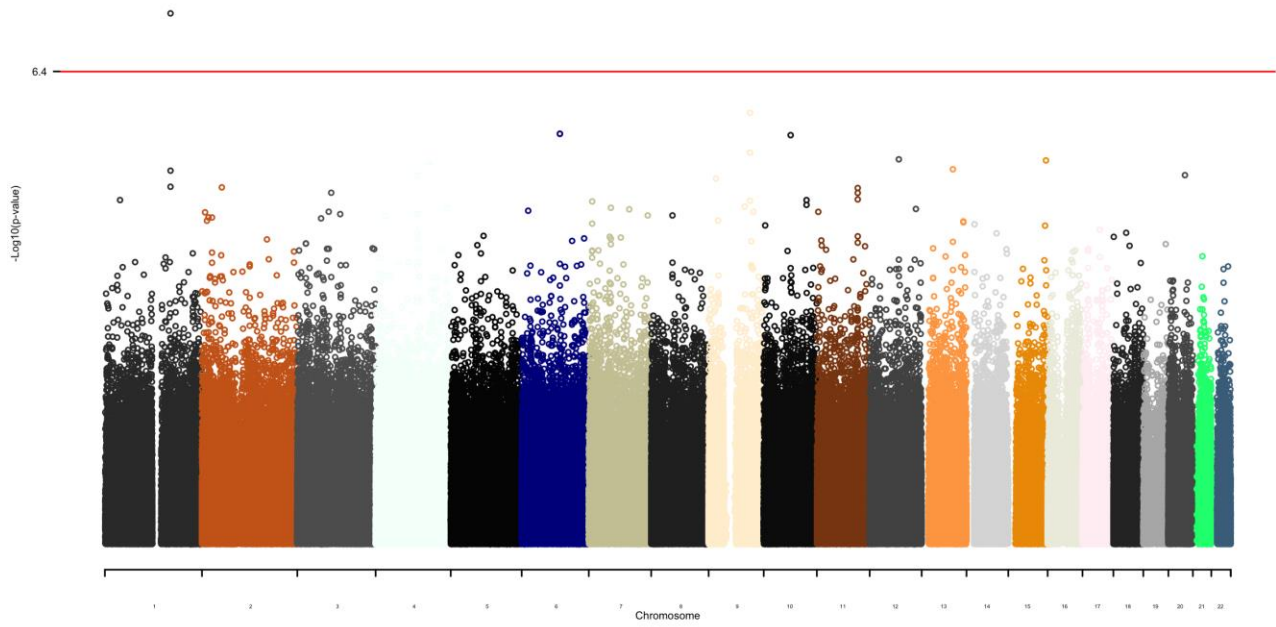

## AA APOExSNP Interactions for Total Cholesterol

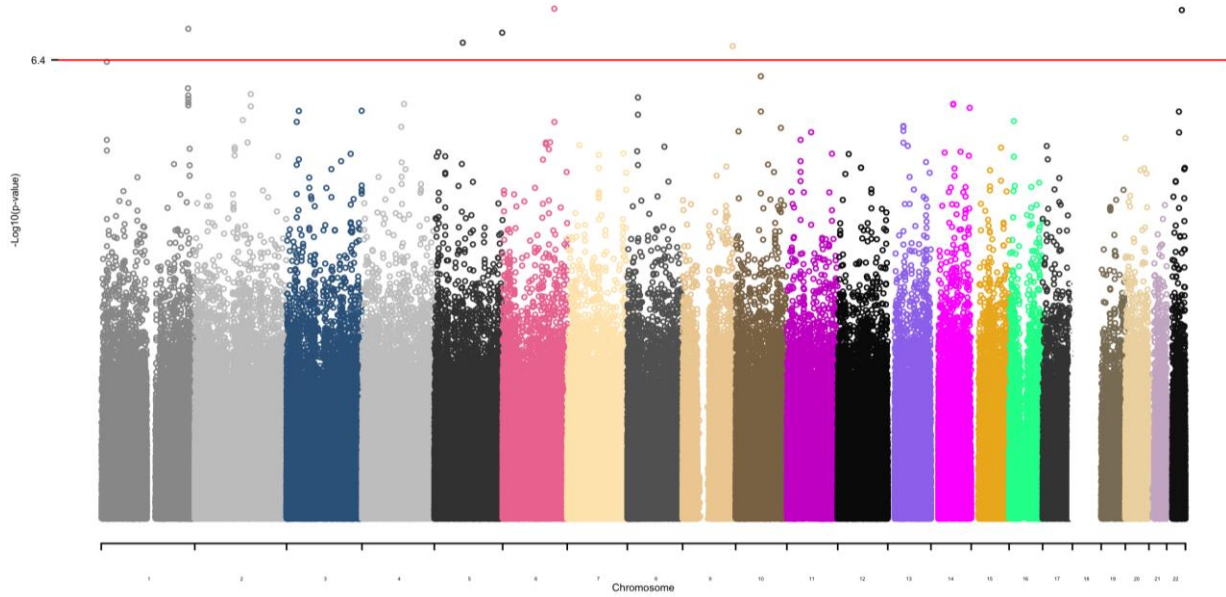

## AA APOExSNP Interactions for HDL

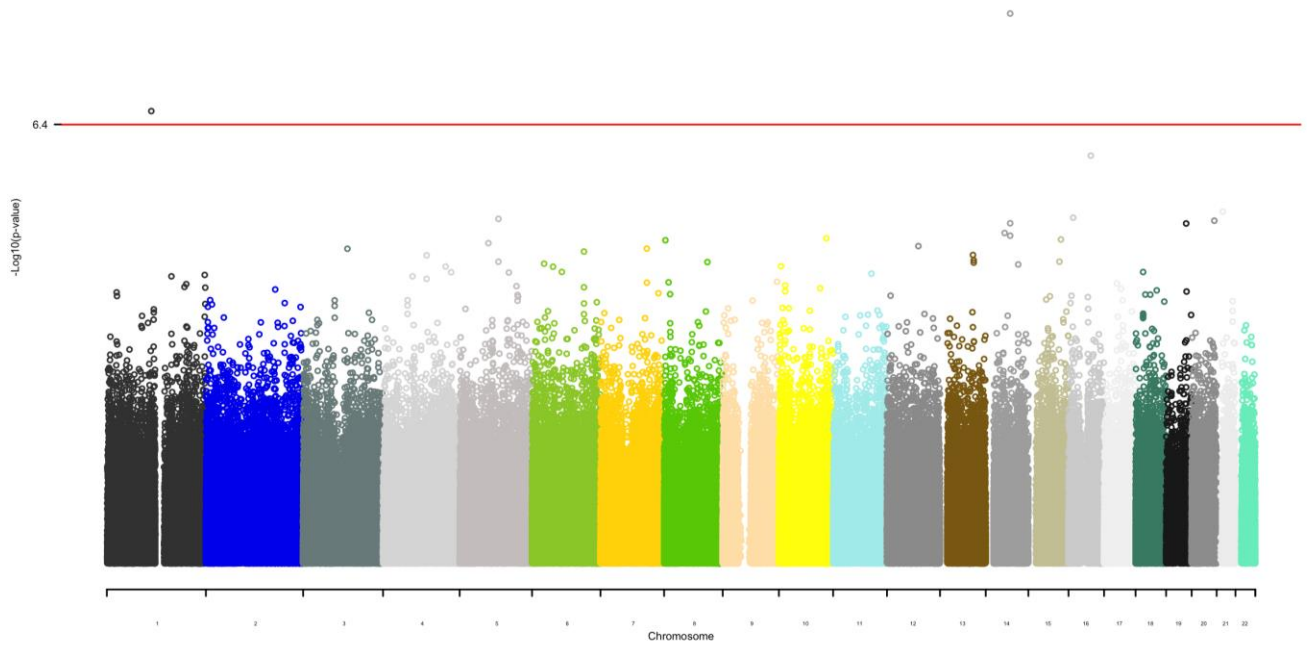

## AA APOExSNP Interactions for LDL

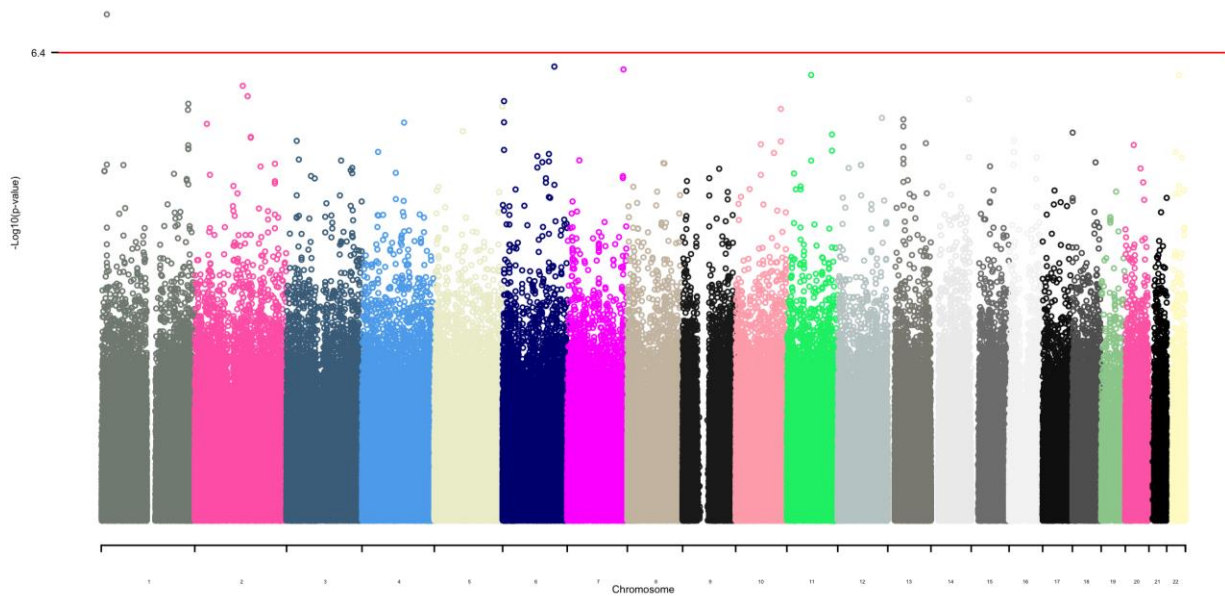

## AA APOExSNP Interactions for Total Cholesterol

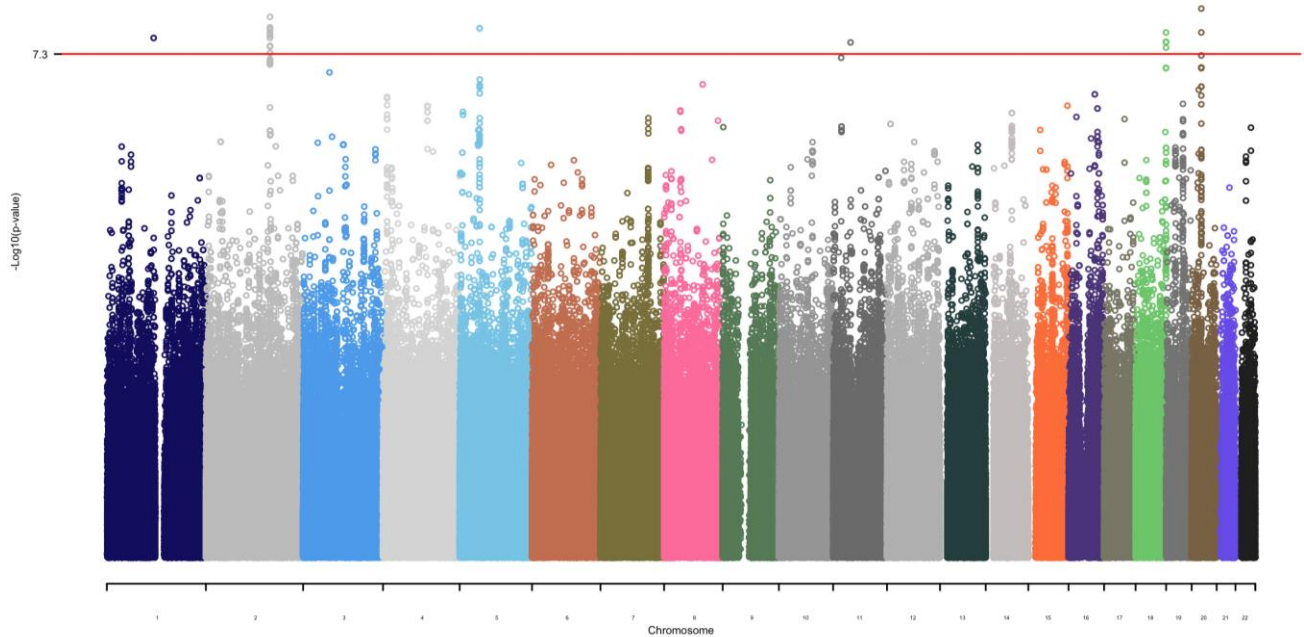

**Figure S4** Manhattan plots for each of the APOExSNP scans. These plots are for the original parametric tests. Note that the SNP density in the European American population is about three times that of the African American population. This would lead to greater clustering around highly significant SNPs.

**Table S1 SNPs from the TC and LDL scans initially significant with the parametric test yet dropped below significance after doing 100 million parametric bootstrap replicates.**

|                              |                       |                     |                  |                       |
|------------------------------|-----------------------|---------------------|------------------|-----------------------|
| <b>Population</b>            | AA                    | AA                  | AA               | AA                    |
| <b>Trait</b>                 | TC                    | TC                  | TC               | TC                    |
| <b>SNP</b>                   | rs7523846             | rs4704260           | rs1867446        | rs10484488            |
| <b>Chromosome</b>            | 1                     | 5                   | 5                | 6                     |
| <b>Location (build 36.3)</b> | 230075483             | 75223049            | 179439720        | 136713787             |
| <b>Maj/Min (MAF)</b>         | G/A (0.098)           | A/T (0.035)         | T/C (0.032)      | T/G (0.104)           |
| <b>Parametric p-val</b>      | 1.47E-07              | 2.29E-07            | 1.66E-07         | 7.69E-08              |
| <b>Par Bootstrap p-val</b>   | 1.05E-06              | 6.49E-06            | 8.99E-06         | 8.60E-07              |
| <b>Gene</b>                  | <i>DISC1</i> (intron) |                     |                  | <i>MAP7</i> (intron)  |
| <b>Left Gene</b>             | <i>DISC2</i>          | <i>LOC391798</i>    | <i>RNF130</i>    | <i>BCLAF1</i>         |
| <b>Right Gene</b>            | <i>SIPA1L2</i>        | <i>LOC100132039</i> | <i>LOC646058</i> | <i>LOC100128745</i>   |
| <b>Population</b>            | AA                    | AA                  | EA               | EA                    |
| <b>Trait</b>                 | TC                    | LDL                 | TC               | TC                    |
| <b>SNP</b>                   | rs10901213            | rs10927458          | rs10924102       | rs1346013             |
| <b>Chromosome</b>            | 9                     | 1                   | 1                | 2                     |
| <b>Location (build 36.3)</b> | 132237274             | 14731263            | 116832505        | 160021586             |
| <b>Maj/Min (MAF)</b>         | A/C (0.122)           | C/A (0.185)         | C/T (0.302)      | G/A (0.486)           |
| <b>Parametric p-val</b>      | 2.56E-07              | 7.50E-07            | 2.93E-08         | 1.45E-08              |
| <b>Par Bootstrap p-val</b>   | 6.70E-07 <sup>a</sup> | 1.20E-07            | 6.00E-07         | 8.00E-08              |
| <b>Gene</b>                  | <i>HMCN2</i> (intron) |                     |                  | <i>BAZ2B</i> (intron) |
| <b>Left Gene</b>             | <i>LOC392395</i>      | <i>PRDM2</i>        | <i>LOC148766</i> | <i>LOC100127929</i>   |
| <b>Right Gene</b>            | <i>ASS1</i>           | <i>RP1-21O18.1</i>  | <i>CD58</i>      | <i>LOC728059</i>      |
| <b>Population</b>            | EA                    | EA                  | EA               | EA                    |
| <b>Trait</b>                 | TC                    | TC                  | TC               | TC                    |
| <b>SNP</b>                   | rs6898102             | rs12223762          | rs12606223       | rs17823542            |
| <b>Chromosome</b>            | 5                     | 11                  | 18               | 20                    |
| <b>Location (build 36.3)</b> | 49910087              | 43546197            | 75914383         | 24071100              |
| <b>Maj/Min (MAF)</b>         | G/A (0.487)           | T/A (0.040)         | T/G (0.289)      | G/C (0.486)           |
| <b>Parametric p-val</b>      | 2.12E-08              | 3.40E-08            | 2.44E-08         | 1.10E-08              |
| <b>Par Bootstrap p-val</b>   | 1.30E-07              | 4.27E-06            | 7.90E-07         | 8.00E-08              |
| <b>Gene</b>                  |                       |                     |                  |                       |
| <b>Left Gene</b>             | <i>EMB</i>            | <i>LOC120449</i>    | <i>C18orf22</i>  | <i>POM121L3</i>       |
| <b>Right Gene</b>            | <i>PARP8</i>          | <i>LOC100131381</i> | <i>ADNP2</i>     | <i>LOC100128232</i>   |

<sup>a</sup>nominally significant in EA (p=0.008)
