# Supplementary material
Source: PubMed Central journal article supplement (PMC3832281)
Supplement: a2694190809951313bbefdf982303490_genetics.113.157719-5.pdf [file a2694190809951313bbefdf982303490_genetics.113.157719-5.pdf]

**Table S1 SNPs from the TC and LDL scans initially significant with the parametric test yet dropped below significance after doing 100 million parametric bootstrap replicates.**

|                              |                       |                     |                  |                       |
|------------------------------|-----------------------|---------------------|------------------|-----------------------|
| <b>Population</b>            | AA                    | AA                  | AA               | AA                    |
| <b>Trait</b>                 | TC                    | TC                  | TC               | TC                    |
| <b>SNP</b>                   | rs7523846             | rs4704260           | rs1867446        | rs10484488            |
| <b>Chromosome</b>            | 1                     | 5                   | 5                | 6                     |
| <b>Location (build 36.3)</b> | 230075483             | 75223049            | 179439720        | 136713787             |
| <b>Maj/Min (MAF)</b>         | G/A (0.098)           | A/T (0.035)         | T/C (0.032)      | T/G (0.104)           |
| <b>Parametric p-val</b>      | 1.47E-07              | 2.29E-07            | 1.66E-07         | 7.69E-08              |
| <b>Par Bootstrap p-val</b>   | 1.05E-06              | 6.49E-06            | 8.99E-06         | 8.60E-07              |
| <b>Gene</b>                  | <i>DISC1</i> (intron) |                     |                  | <i>MAP7</i> (intron)  |
| <b>Left Gene</b>             | <i>DISC2</i>          | <i>LOC391798</i>    | <i>RNF130</i>    | <i>BCLAF1</i>         |
| <b>Right Gene</b>            | <i>SIPA1L2</i>        | <i>LOC100132039</i> | <i>LOC646058</i> | <i>LOC100128745</i>   |
| <b>Population</b>            | AA                    | AA                  | EA               | EA                    |
| <b>Trait</b>                 | TC                    | LDL                 | TC               | TC                    |
| <b>SNP</b>                   | rs10901213            | rs10927458          | rs10924102       | rs1346013             |
| <b>Chromosome</b>            | 9                     | 1                   | 1                | 2                     |
| <b>Location (build 36.3)</b> | 132237274             | 14731263            | 116832505        | 160021586             |
| <b>Maj/Min (MAF)</b>         | A/C (0.122)           | C/A (0.185)         | C/T (0.302)      | G/A (0.486)           |
| <b>Parametric p-val</b>      | 2.56E-07              | 7.50E-07            | 2.93E-08         | 1.45E-08              |
| <b>Par Bootstrap p-val</b>   | 6.70E-07 <sup>a</sup> | 1.20E-07            | 6.00E-07         | 8.00E-08              |
| <b>Gene</b>                  | <i>HMCN2</i> (intron) |                     |                  | <i>BAZ2B</i> (intron) |
| <b>Left Gene</b>             | <i>LOC392395</i>      | <i>PRDM2</i>        | <i>LOC148766</i> | <i>LOC100127929</i>   |
| <b>Right Gene</b>            | <i>ASS1</i>           | <i>RP1-21O18.1</i>  | <i>CD58</i>      | <i>LOC728059</i>      |
| <b>Population</b>            | EA                    | EA                  | EA               | EA                    |
| <b>Trait</b>                 | TC                    | TC                  | TC               | TC                    |
| <b>SNP</b>                   | rs6898102             | rs12223762          | rs12606223       | rs17823542            |
| <b>Chromosome</b>            | 5                     | 11                  | 18               | 20                    |
| <b>Location (build 36.3)</b> | 49910087              | 43546197            | 75914383         | 24071100              |
| <b>Maj/Min (MAF)</b>         | G/A (0.487)           | T/A (0.040)         | T/G (0.289)      | G/C (0.486)           |
| <b>Parametric p-val</b>      | 2.12E-08              | 3.40E-08            | 2.44E-08         | 1.10E-08              |
| <b>Par Bootstrap p-val</b>   | 1.30E-07              | 4.27E-06            | 7.90E-07         | 8.00E-08              |
| <b>Gene</b>                  |                       |                     |                  |                       |
| <b>Left Gene</b>             | <i>EMB</i>            | <i>LOC120449</i>    | <i>C18orf22</i>  | <i>POM121L3</i>       |
| <b>Right Gene</b>            | <i>PARP8</i>          | <i>LOC100131381</i> | <i>ADNP2</i>     | <i>LOC100128232</i>   |

<sup>a</sup>nominally significant in EA (p=0.008)
