# Supplementary material
Source: PubMed Central journal article supplement (PMC3832281)
Supplement: da3ca2f7826c34984e6094582ecce05e_genetics.113.157719-6.pdf [file da3ca2f7826c34984e6094582ecce05e_genetics.113.157719-6.pdf]

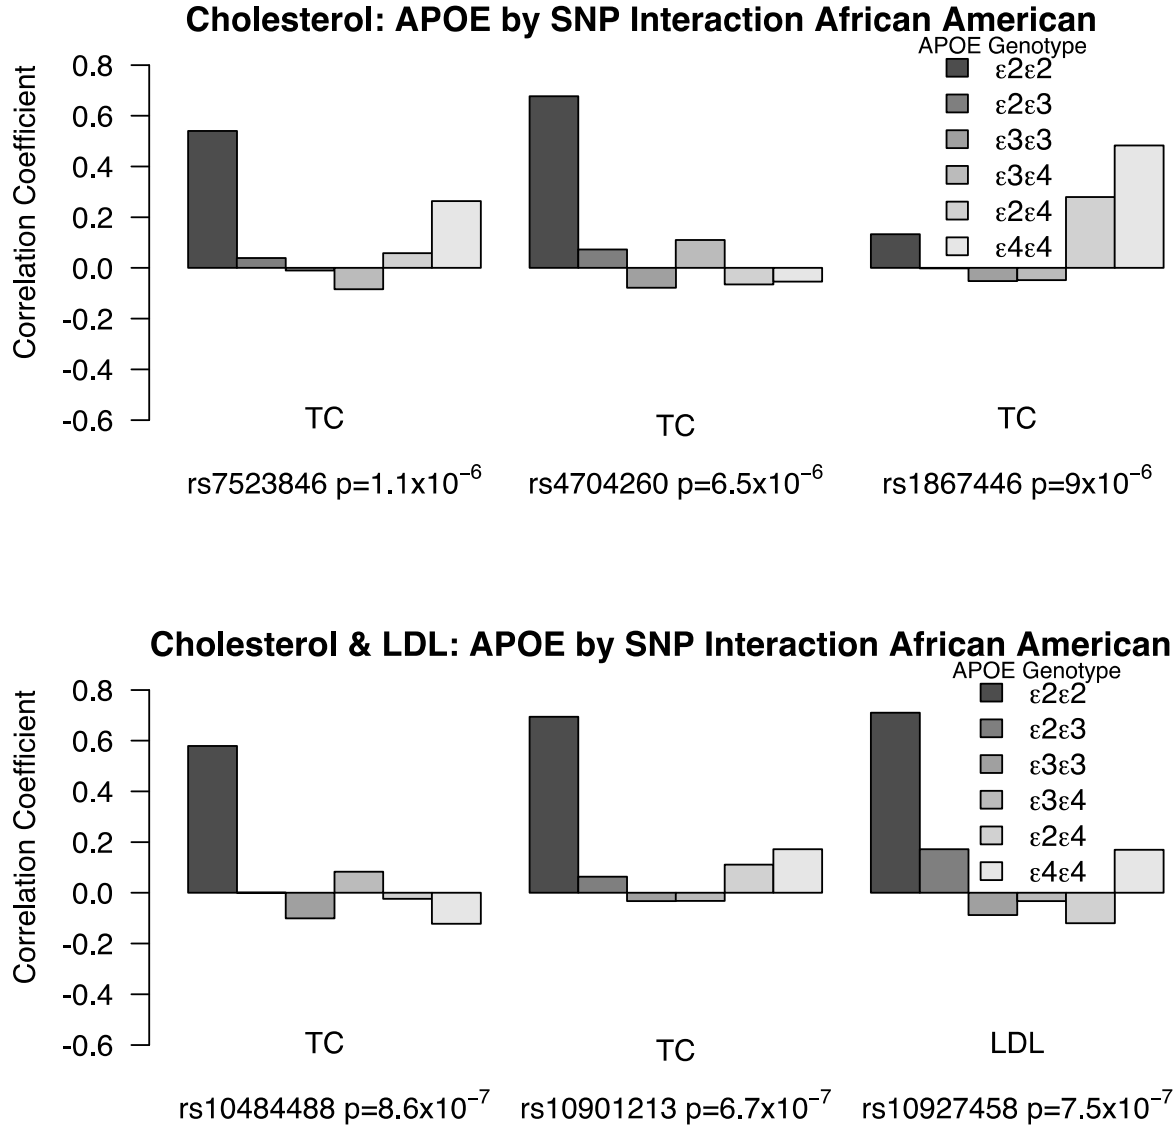

**Figure S1** A plot similar to **Figure 2** in the main text for each of the SNPs in **Table S1** that interact with APOE to affect TC and LDL in African Americans. These tests were significant with the parametric test yet dropped below significance after calculating empirical p-values with 100 million parametric bootstrap replicate for each SNP. Plots are based on *within* APOE genotype models after adjusting for covariates while the p-values are based on the APOE\*SNP interaction in the full model where the APOE genotypes are treated as factors and the SNP is treated as a (0,1,2) additive variable. The beta coefficients from the linear model provide the same story but the correlation coefficient is easier to visualize.
