# Supplementary material
Source: PubMed Central journal article supplement (PMC3832281)
Supplement: e920e27907c2d98b485f7041e70e2b38_genetics.113.157719-3.pdf [file e920e27907c2d98b485f7041e70e2b38_genetics.113.157719-3.pdf]

APOExSNP CHD AA

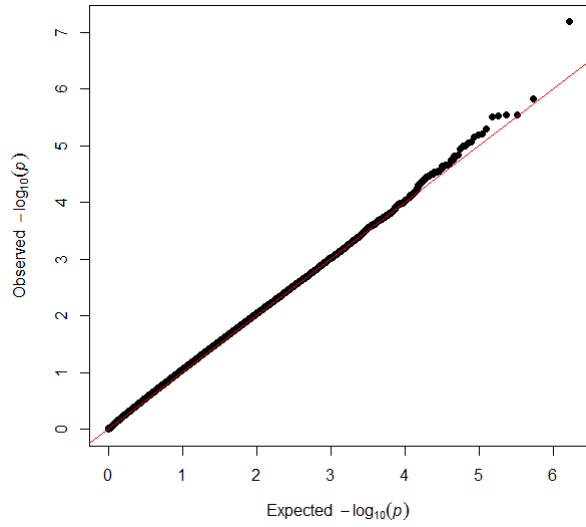

APOExSNP TC AA

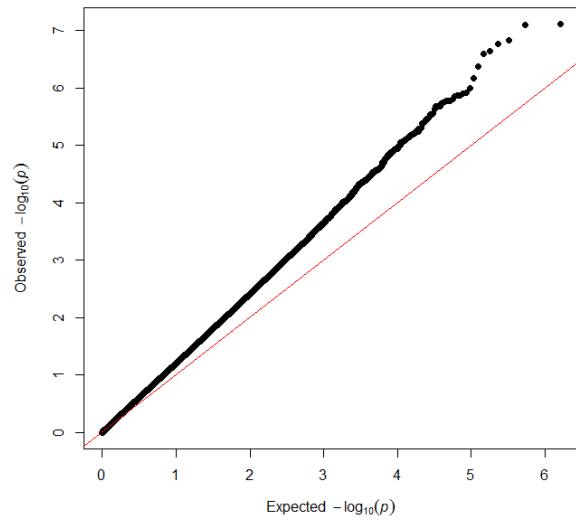

APOExSNP LDL AA

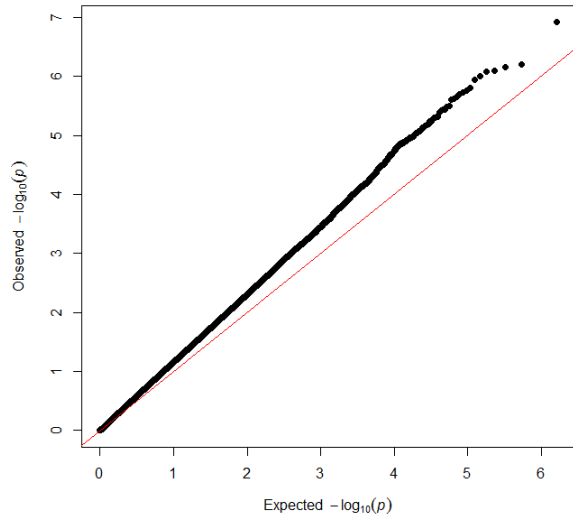

APOExSNP HDL AA

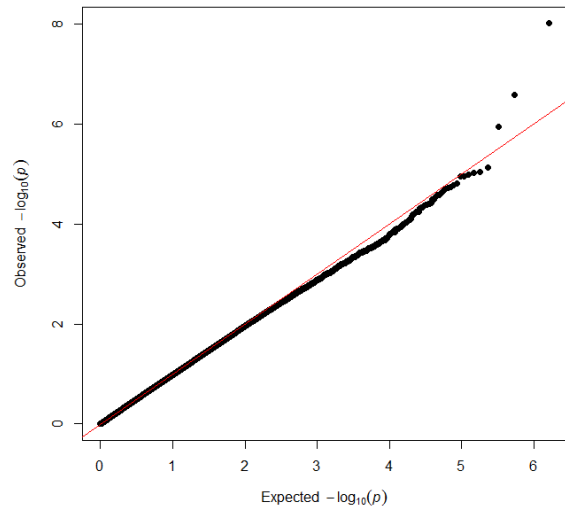

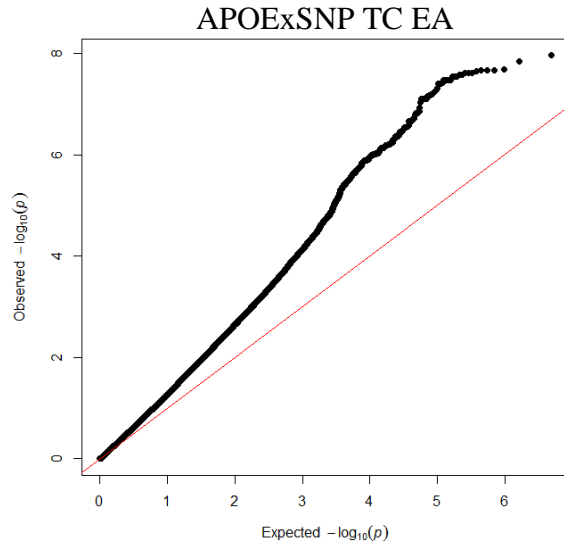

**Figure S3** QQ Plots for each of the APOE x SNP interaction scans from the parametric tests.
